# Supplementary material
Source: PubMed Central journal article supplement (PMC3926885)
Supplement: cbt-14-888-s01.pdf [file cbt-14-888-s01.pdf]

## **Supplemental Material to:**

**Bedri Karakas, Dilek Colak, Namik Kaya, Hazem Ghebeh<sup>4</sup>  
Abeer Al-Qasem, Fawziah Hendrayani, Mohamed  
Toulimat, Taher Al-Tweigeri, Ben Ho Park, and Abdelilah  
Aboussekhra**

**Prevalence of PIK3CA mutations and the SNP rs17849079  
in Arab breast cancer patients**

**Cancer Biology & Therapy 2012; 14(10)**

**<http://dx.doi.org/10.4161/cbt.25945>**

**<http://www.landesbioscience.com/journals/cbt/article/25945/>**

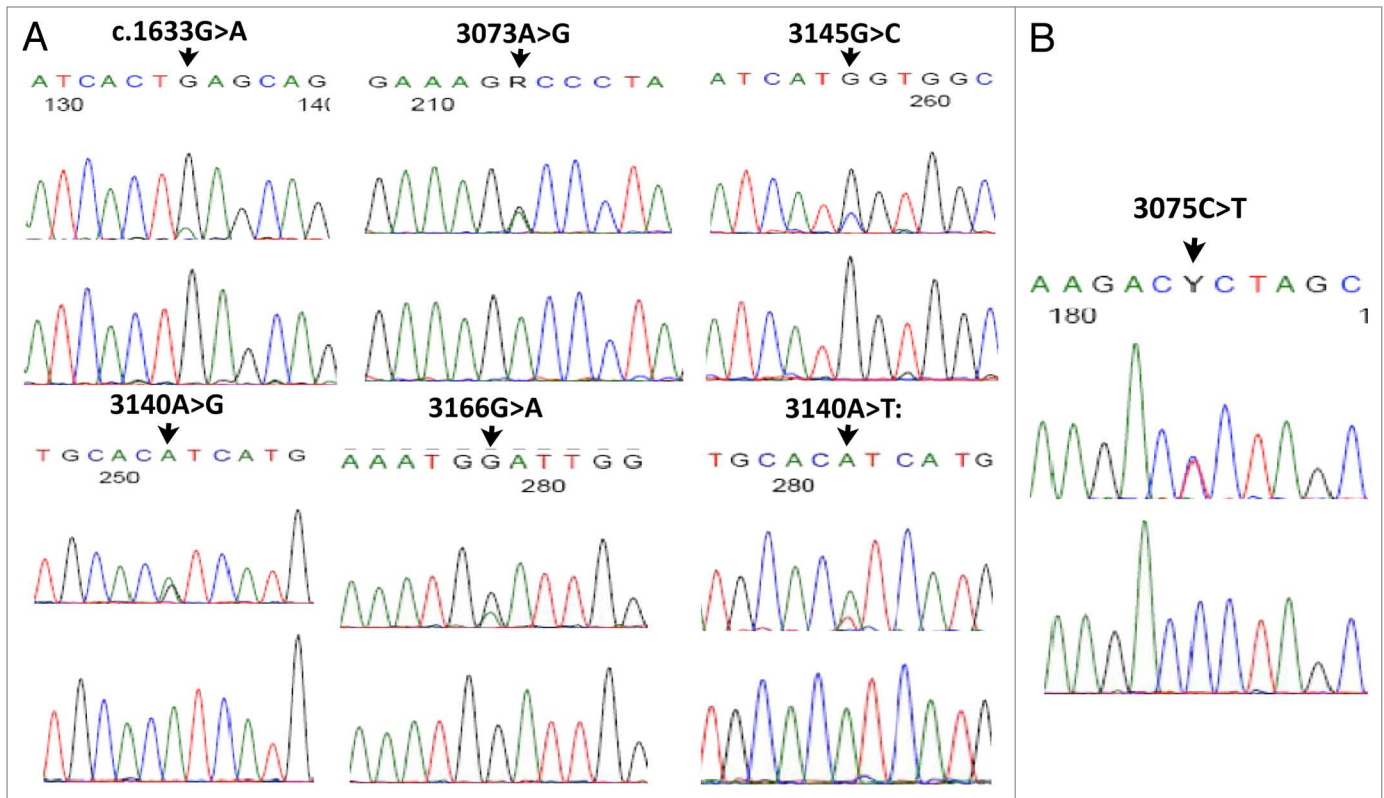

**Figure S1. (A)** The representative sequencing chromatographs of PIK3CA mutations found in Arabian breast cancers patients. The text above each chromatograph indicates the change and position of nucleotide and amino acid in PIK3CA coding sequence. The arrow shows the mutated (upper) and the wild type (lower) alleles. **(B)** The sequencing chromatograph of PIK3CA C3075T SNP (rs17849079). The text above the chromatograph indicates the change and position of nucleotide and amino acid in PIK3CA coding sequence. The arrow shows the C3075T SNP (upper) and the wild type (lower) allele.

**Table S1.** The primers used in PCR amplifications and direct sequencing reactions.

| Primer          | Sequence                     | Primer type | Amplicon Size (bp) |
|-----------------|------------------------------|-------------|--------------------|
| Exon 1 Forward  | CTCCACGACC ATCATCAGG         | PCR         | 446                |
| Exon 1 Reverse  | GATTACGAAG GTATTGTTT AGACAG  | PCR         |                    |
| Exon 1 S1       | CTGCTTCTTG AGTAACACTT ACG    | Sequencing  |                    |
| Exon 1 S2       | CCCCCTCCAT CAACTTCTTC        | Sequencing  |                    |
| Exon 9 Forward  | GATTGGTTCT TTCCTGTCTC TG     | PCR         | 487                |
| Exon 9 Reverse  | CCACAAATAT CAATTTACAA CCATTG | PCR         |                    |
| Exon 9 S        | TAAATCATCT GTGAATCCAG AG     | Sequencing  |                    |
| Exon 20 Forward | TGACATTTGA GCAAAGACCT G      | PCR         | 444                |
| Exon 20 Reverse | GGATTGTGCA ATTCCTATGC        | PCR         |                    |
| Exon 20 S       | CCTATGCAAT CGGTCTTTGC        | Sequencing  |                    |
